# Supplementary material
Source: publisher figshare collection journal article supplement (https://acs.figshare.com/ndownloader/files/4290700)
Supplement: Supplementary file 1 [file 4290700]

# Measurement of Raman $\chi^{(3)}$ and Theoretical Estimation of DOVE Four Wave Mixing of Hydrogen Peroxide

Wei Zhao\*

Department of Chemistry, University of Arkansas at Little Rock, 2801 South University Avenue, Little Rock, Arkansas 72204, United States

\* Email: wxzhao@ualr.edu

## SUPPORTING INFORMATION

### 1. Stability of 30% $\text{H}_2\text{O}_2$ -THF Mixtures

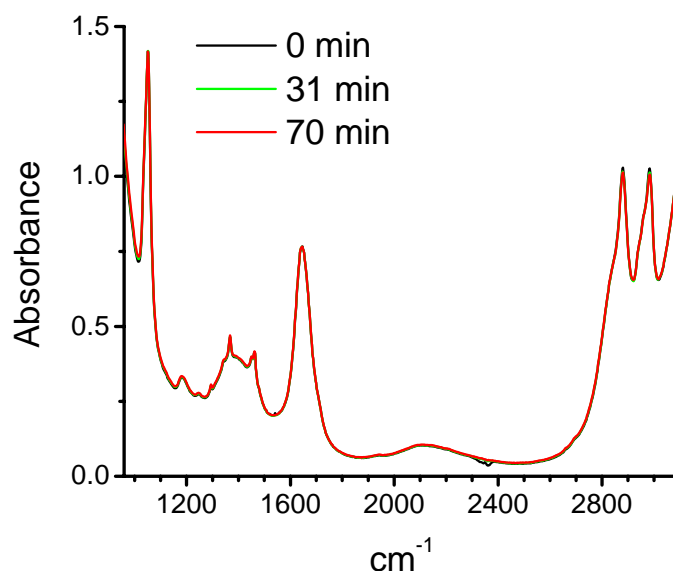

Fig. 1S. Time-dependent IR spectra of a THF-30%  $\text{H}_2\text{O}_2$  mixture (1:1 in volume) measured over time after mixing. There are no time-dependent spectral intensity changes in THF and  $\text{H}_2\text{O}_2$ , suggesting no reaction occurring in the mixture over time under the experimental condition.

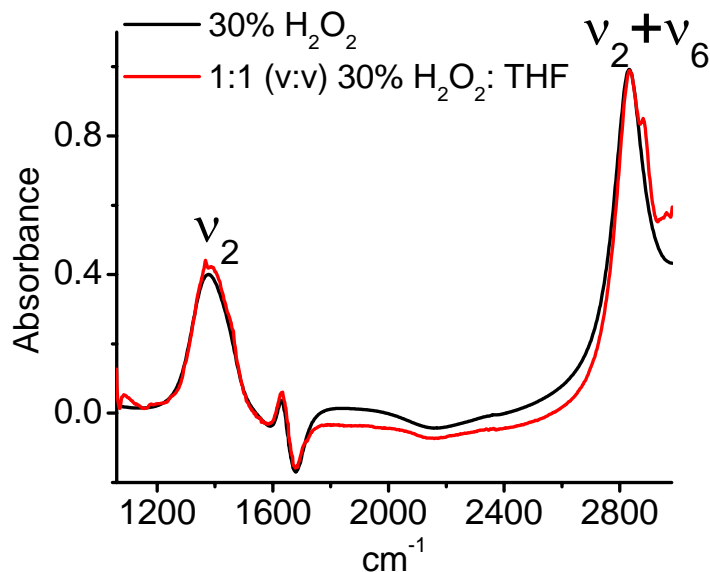

Fig. 2S. Difference IR spectra showing  $\text{H}_2\text{O}_2$  absorption features  $\nu_2$  and  $\nu_2+\nu_6$  in a 30%  $\text{H}_2\text{O}_2$  sample after subtracting  $\text{H}_2\text{O}$  absorption (in black), and in a 30%  $\text{H}_2\text{O}_2$ -THF mixture (1:1 in volume, measured at 70 min after mixing) after subtracting the absorption of a  $\text{H}_2\text{O}$ -THF mixture (1:1 in volume) (in red). The later spectrum times a factor of 2 for dilution correction. The two spectral curves are overlapping in peak position and intensity, indicating that  $\text{H}_2\text{O}_2$  molecules are stable and do not change after mixing with THF.

## 2. FWM Spectra of Neat THF and 30% $\text{H}_2\text{O}_2$ Solution

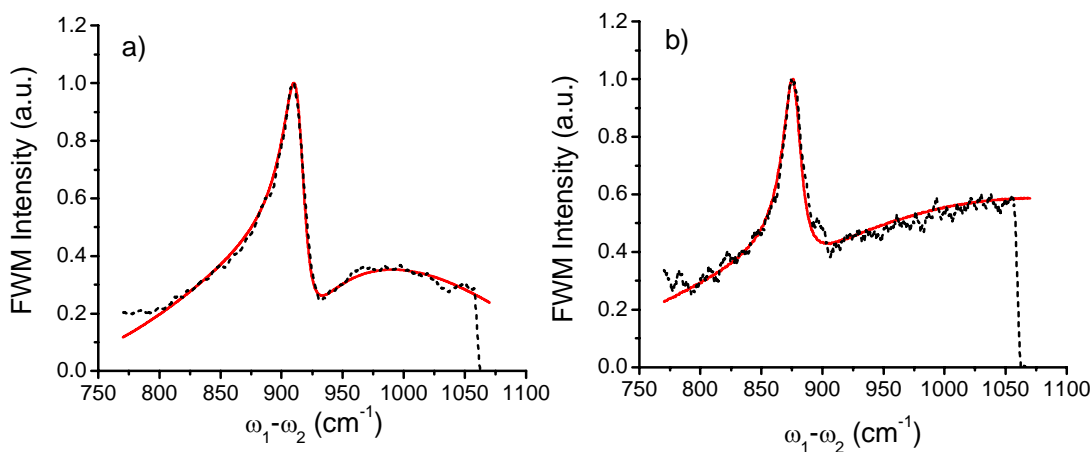

Fig. 3S. FWM spectra of neat THF (a) and 30%  $\text{H}_2\text{O}_2$  aqueous solution (b). The fitting curves are shown in red.
